# Supplementary material for: Formation and Stabilization of Gold Nanoparticles in Bovine Serum Albumin Solution
Source: PubMed Central journal article supplement (PMC6766809; doi:10.3390/molecules24183395), 2019-09-18
Supplement: molecules-24-03395-s001.pdf [file molecules-24-03395-s001.pdf]

# **Formation and stabilization of gold nanoparticles in bovine serum albumin solution**

**Iulia Matei, Maria Cristina Buta, Ioana Maria Turcu, Daniela Culita, Cornel Munteanu and Gabriela Ionita \***

„Ilie Murgulescu” Institute of Physical Chemistry of the Romanian Academy, Splaiul Independentei 202, Bucharest 060021, Romania;

\* Correspondence: [ige@icf.ro](mailto:ige@icf.ro) (G.I.)

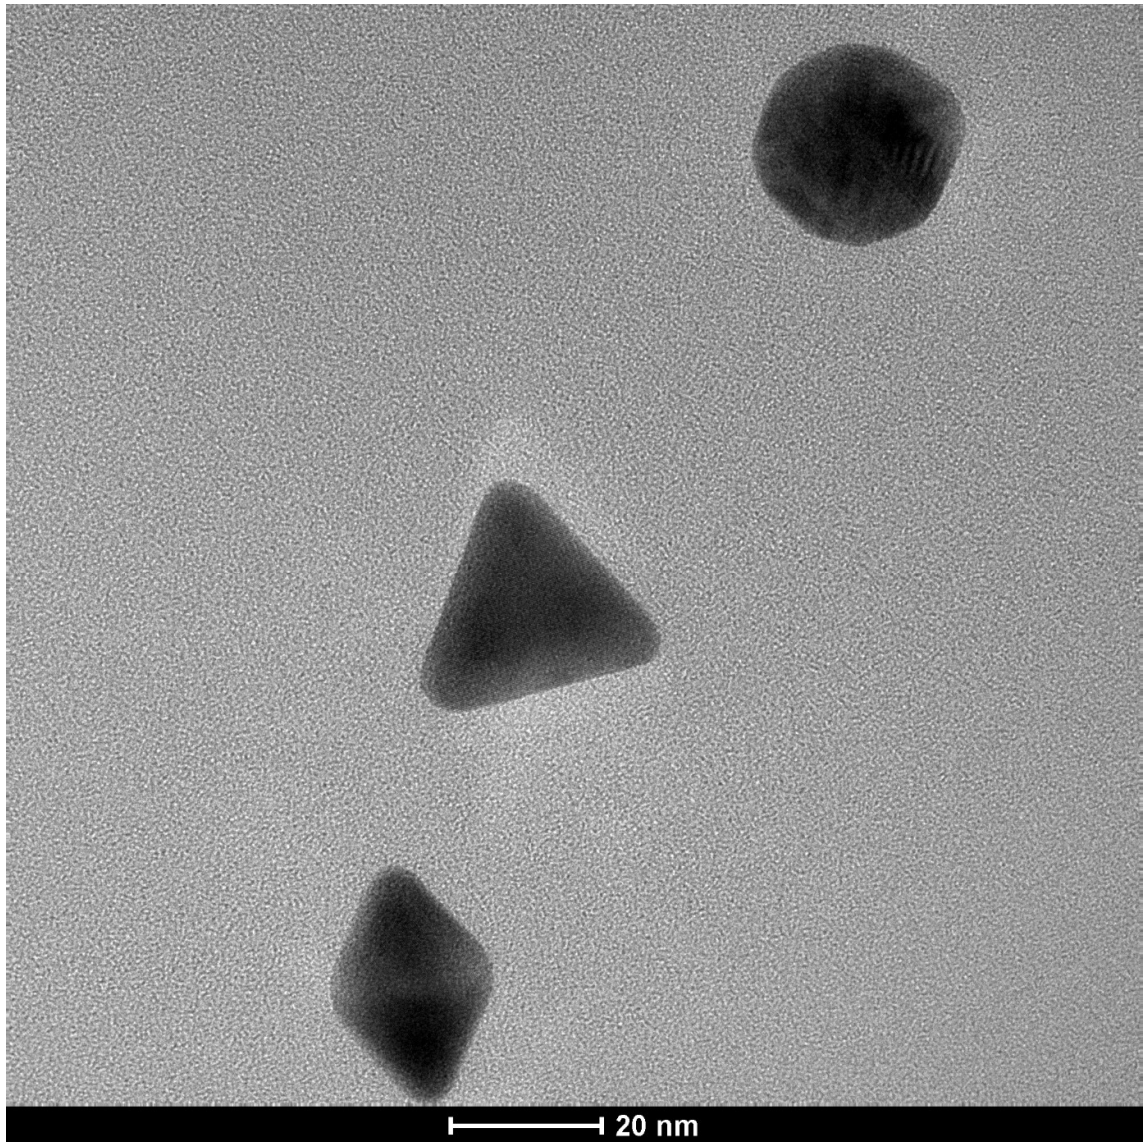

**Figure S1.** TEM images of gold nanoparticles formed in BSA evidencing the presence of various shapes.

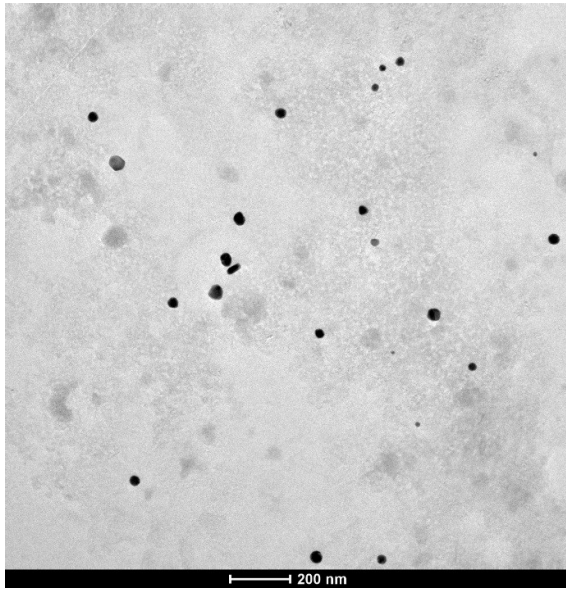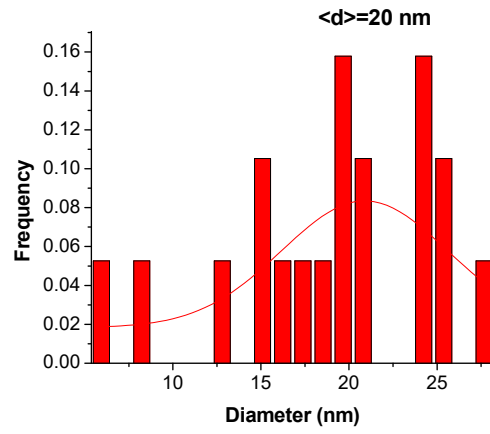

**Figure S2.** TEM image and size distribution of gold nanoparticles formed in BSA after three weeks.

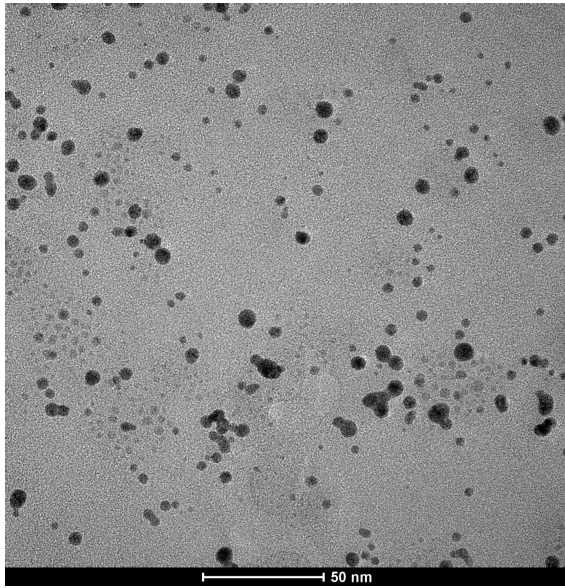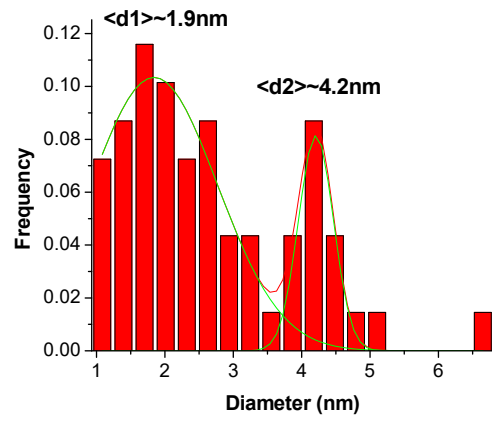

**Figure S3.** TEM image of gold nanoparticles with smaller particle size (roughly 4 nm) formed after adding a new quantity of Au(III).

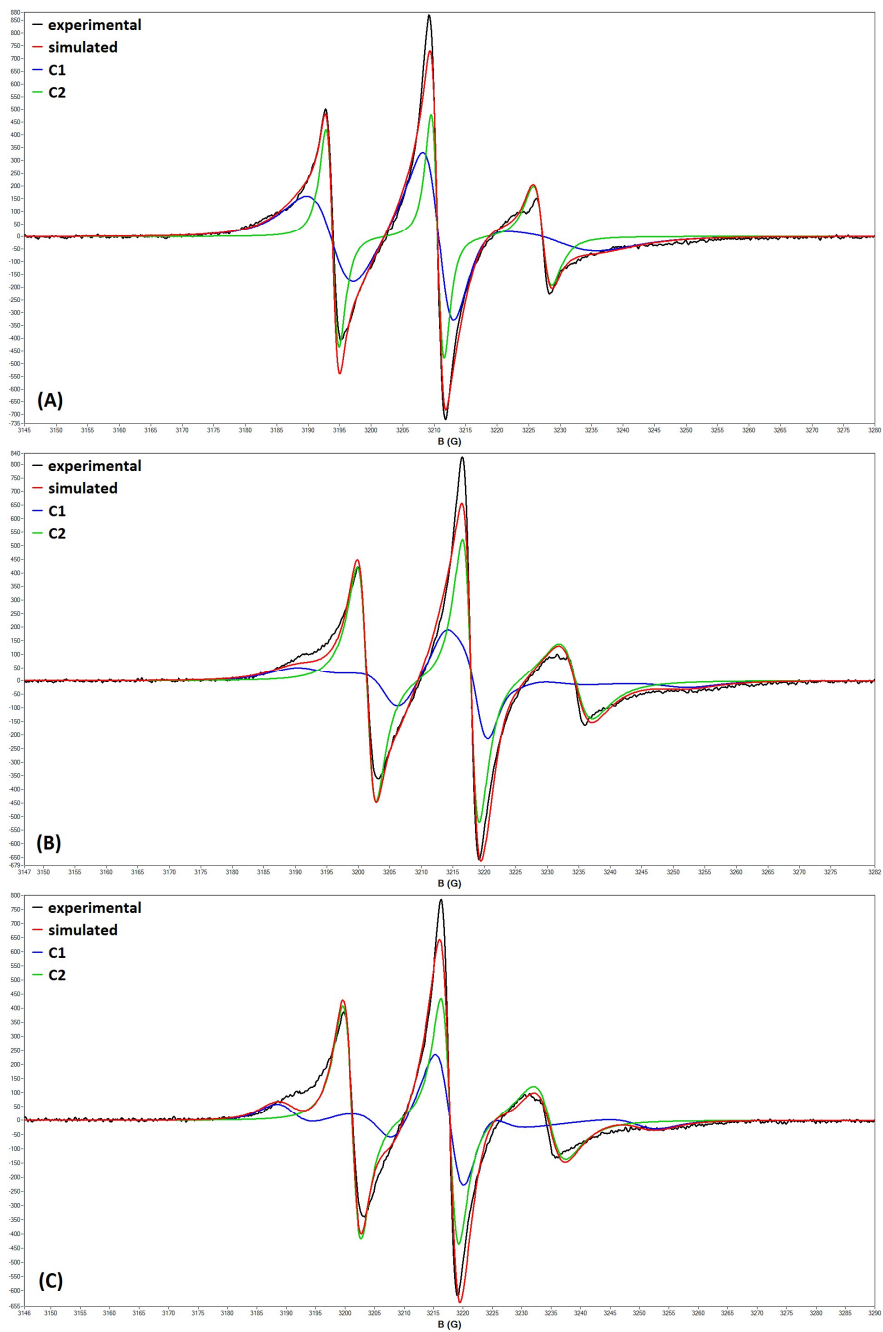

**Figure S4.** Simulated EPR spectra of CAT16 in (A) BSA (10 mg/ml), (B) BSA/AuNPs after 10 days and (C) BSA/AuNPs after 17 days.

**Table S1.** EPR parameters obtained by spectral simulation

| <b>BSA</b>                                                                                                                                                                                                                                                                                                                                                                                                                                                                                                                                                                                                                                                                                                       | <b>BSA/Au<sup>0</sup>, 10 days</b>                                                                                                                                                                                                                                                                                                                                                                                                                                                                                                                                                                                                                                                                              | <b>BSA/Au<sup>0</sup>, 17 days</b>                                                                                                                                                                                                                                                                                                                                                                                                                                                                                                                                                                                                                                                                              |
|------------------------------------------------------------------------------------------------------------------------------------------------------------------------------------------------------------------------------------------------------------------------------------------------------------------------------------------------------------------------------------------------------------------------------------------------------------------------------------------------------------------------------------------------------------------------------------------------------------------------------------------------------------------------------------------------------------------|-----------------------------------------------------------------------------------------------------------------------------------------------------------------------------------------------------------------------------------------------------------------------------------------------------------------------------------------------------------------------------------------------------------------------------------------------------------------------------------------------------------------------------------------------------------------------------------------------------------------------------------------------------------------------------------------------------------------|-----------------------------------------------------------------------------------------------------------------------------------------------------------------------------------------------------------------------------------------------------------------------------------------------------------------------------------------------------------------------------------------------------------------------------------------------------------------------------------------------------------------------------------------------------------------------------------------------------------------------------------------------------------------------------------------------------------------|
| <p><b>component 1</b></p> <p><math>g_{xx}, g_{yy}, g_{zz} = 2.0085, 2.0056, 2.0035</math></p> <p><math>A_{xx}, A_{yy}, A_{zz} = 7.0, 7.0, 36.0</math> (<math>a_N = 16.7</math> G)</p> <p><math>R_{prp} = 7.15, R_{pll} = 8.00</math></p> <p><math>g_{ib0} = 2.0</math></p> <p>79.1%</p> <p><math>\tau = 6.30 \times 10^{-9}</math> s</p> <p><b>component 2</b></p> <p><math>g_{xx}, g_{yy}, g_{zz} = 2.0085, 2.0056, 2.0035</math></p> <p><math>A_{xx}, A_{yy}, A_{zz} = 6.5, 7.0, 36.5</math> (<math>a_N = 16.7</math> G)</p> <p><math>R_{prp} = 8.20, R_{pll} = 8.75</math></p> <p><math>g_{ib0} = 1.0</math></p> <p>20.9%</p> <p><math>\tau = 6.96 \times 10^{-10}</math> s</p> <p><math>R = 0.988</math></p> | <p><b>component 1</b></p> <p><math>g_{xx}, g_{yy}, g_{zz} = 2.0085, 2.0056, 2.0035</math></p> <p><math>A_{xx}, A_{yy}, A_{zz} = 7.0, 7.0, 36.5</math> (<math>a_N = 16.8</math> G)</p> <p><math>R_{prp} = 6.40, R_{pll} = 7.70</math></p> <p><math>g_{ib0} = 2.5</math></p> <p>50.8%</p> <p><math>\tau = 2.60 \times 10^{-8}</math> s</p> <p><b>component 2</b></p> <p><math>g_{xx}, g_{yy}, g_{zz} = 2.0085, 2.0056, 2.0035</math></p> <p><math>A_{xx}, A_{yy}, A_{zz} = 6.0, 6.5, 36.5</math> (<math>a_N = 16.3</math> G)</p> <p><math>R_{prp} = 7.80, R_{pll} = 8.50</math></p> <p><math>g_{ib0} = 0.5</math></p> <p>49.2%</p> <p><math>\tau = 1.57 \times 10^{-9}</math> s</p> <p><math>R = 0.986</math></p> | <p><b>component 1</b></p> <p><math>g_{xx}, g_{yy}, g_{zz} = 2.0085, 2.0056, 2.0035</math></p> <p><math>A_{xx}, A_{yy}, A_{zz} = 6.5, 6.5, 36.0</math> (<math>a_N = 16.3</math> G)</p> <p><math>R_{prp} = 7.10, R_{pll} = 7.20</math></p> <p><math>g_{ib0} = 2.5</math></p> <p>48.1%</p> <p><math>\tau = 1.23 \times 10^{-8}</math> s</p> <p><b>component 2</b></p> <p><math>g_{xx}, g_{yy}, g_{zz} = 2.0085, 2.0056, 2.0035</math></p> <p><math>A_{xx}, A_{yy}, A_{zz} = 6.0, 6.5, 36.0</math> (<math>a_N = 16.2</math> G)</p> <p><math>R_{prp} = 7.70, R_{pll} = 8.70</math></p> <p><math>g_{ib0} = 1.0</math></p> <p>51.9%</p> <p><math>\tau = 1.59 \times 10^{-9}</math> s</p> <p><math>R = 0.981</math></p> |
